# Supplementary material
Source: Springer Nature journal article supplement (https://www.springermedizin.de/resource/supplementary/12958_2004_147_MOESM1_ESM.pdf/9567244)

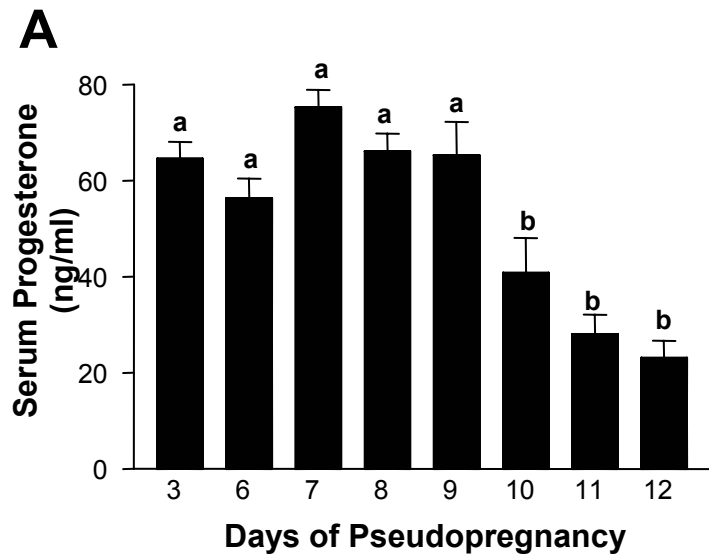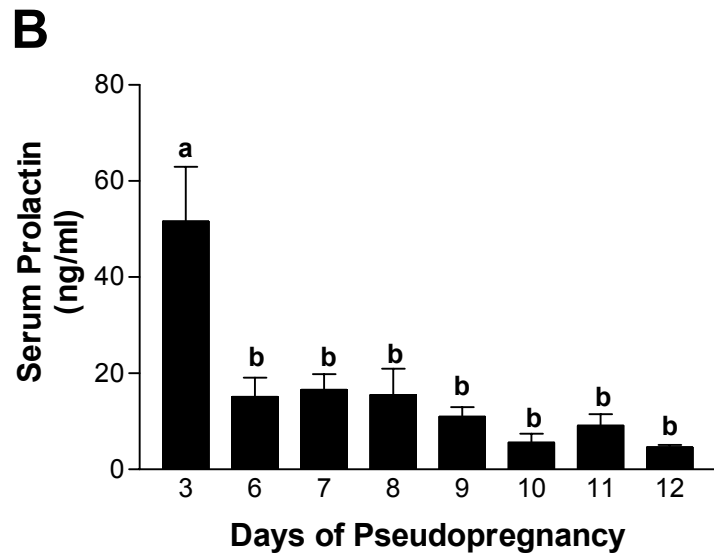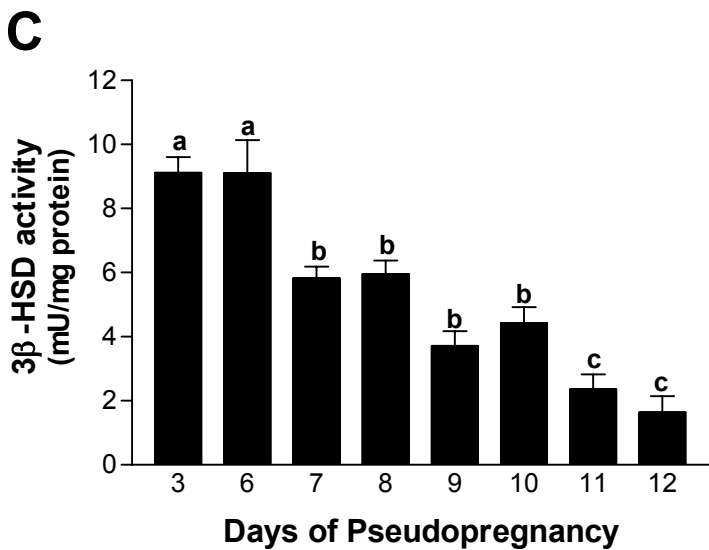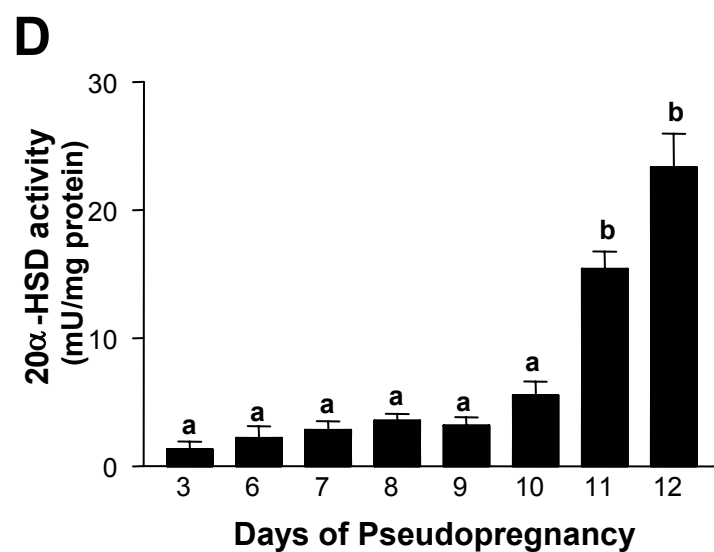

Supplement: MOESM1 [file 9567244]
